# Supplementary material
Source: PubMed Central journal article supplement (PMC5582849)
Supplement: 10.1074_M117.796011_jbc.M117.796011-1.pdf [file 10.1074_M117.796011_jbc.M117.796011-1.pdf]

## Supplemental Information

### **The non-homologous end-joining factor Nej1 inhibits resection mediated by Dna2-Sgs1 at DNA double strand breaks**

Kyle S. Sorenson, Brandi L. Mahaney, Susan P. Lees-Miller, and Jennifer A. Cobb\*

Departments of Biochemistry & Molecular Biology and Oncology, Robson DNA Science Centre, Arnie Charbonneau Cancer Institute, Cumming School of Medicine; University of Calgary; 3330 Hospital Drive N.W., Calgary, AB T2N 4N1, Canada

Supplemental Figure S1. Chromatin immunoprecipitation (ChIP) in non-tagged controls.

Supplemental Figure S2. Resection in *exo1Δ rad50Δ* and in combination with other mutations.

Supplemental Figure S3. Mating types of all survivors in Fig 5D-F.

Supplemental Table S1: % G1 arrested cells following alpha-factor treatment vs asynchronous cells

Supplemental Table S2: Strains used in this study

Supplemental Table S3: Primers and probes used in this study

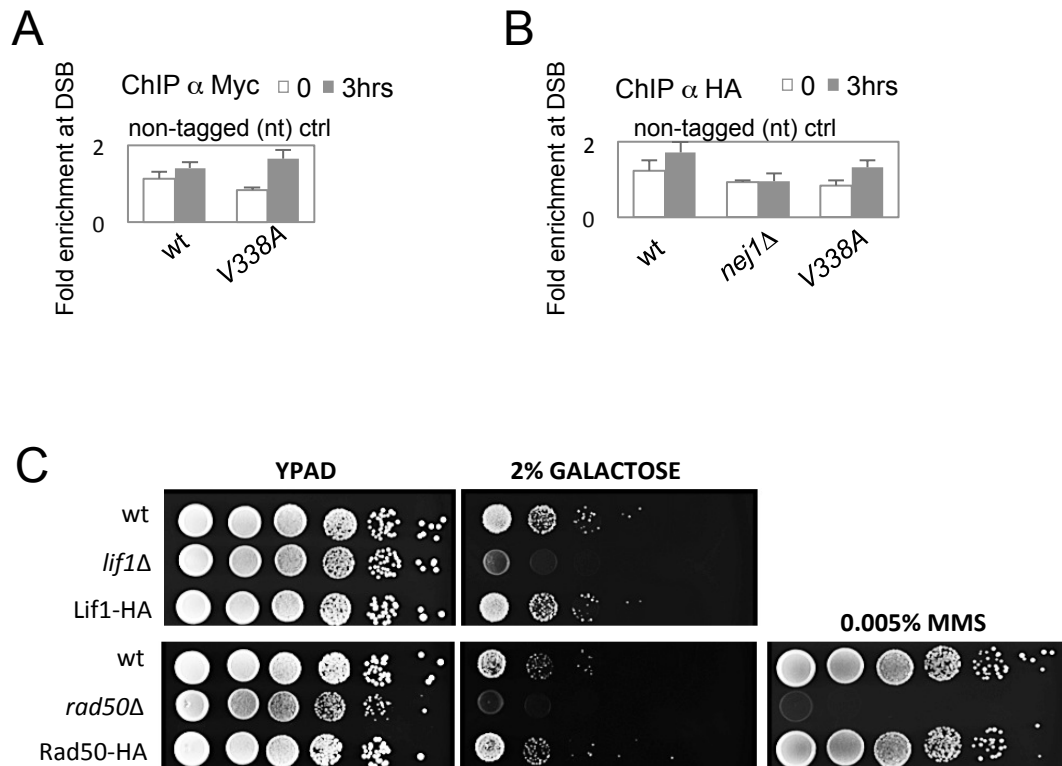

**Figure S1. Chromatin immunoprecipitation (ChIP) in non-tagged controls.** (A-B) ChIP with  $\alpha$ -Myc and  $\alpha$ -HA was performed on non-tagged control wild type (JC727), *nej1* $\Delta$  (JC1342) and *nej1*-V338A (JC2659) cells in parallel with the ChIP experiments described in Figs. 1G-H and Fig. 2G. The inclusion of the Myc-epitope tag was previously shown to not compromise Nej1 functionality (16) and (C) Drop assays with wild type (JC727), *lif1* $\Delta$  (JC1343), Lif1-3HA (JC2665), *rad50* $\Delta$  (JC3313) and Rad50-6HA (JC3306) show that the HA- epitope tagged fusions do not compromise sensitivity to genotoxic stress as the survival of the fusion are similar to wild type.

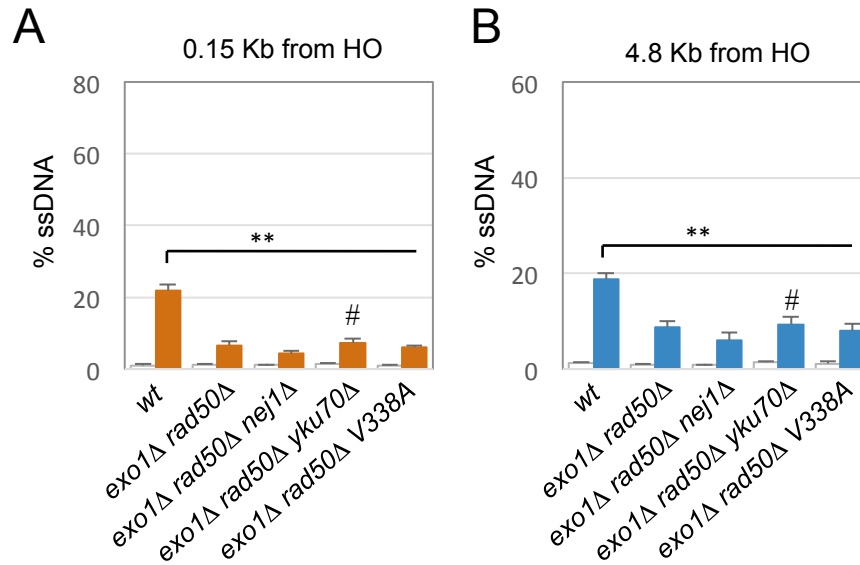

**Figure S2. Resection in *exo1Δ rad50Δ* and in combination with other mutations.** Resection of DNA 0.15kb and 4.8kb away from the HO DSB, as measured by % ssDNA at 0 and 6 hrs. post DSB induction in G1 cells in (A-B) wild type (JC3585), *exo1Δ rad50Δ* (JC3881), *exo1Δ rad50Δ nej1Δ* (JC3889), *exo1Δ rad50Δ yku70Δ* (JC3880) and *exo1Δ rad50Δ nej1-V338A* (JC3901). Error bars represent standard error of three replicates. Significance was determined using 1-tailed, unpaired Student's t test where mutants were compared with wild type cells for changes in resection levels ( $P < 0.01$  \*\*). # indicates statistical difference compared to *rad50Δ yku70Δ* at  $P < 0.01$ .

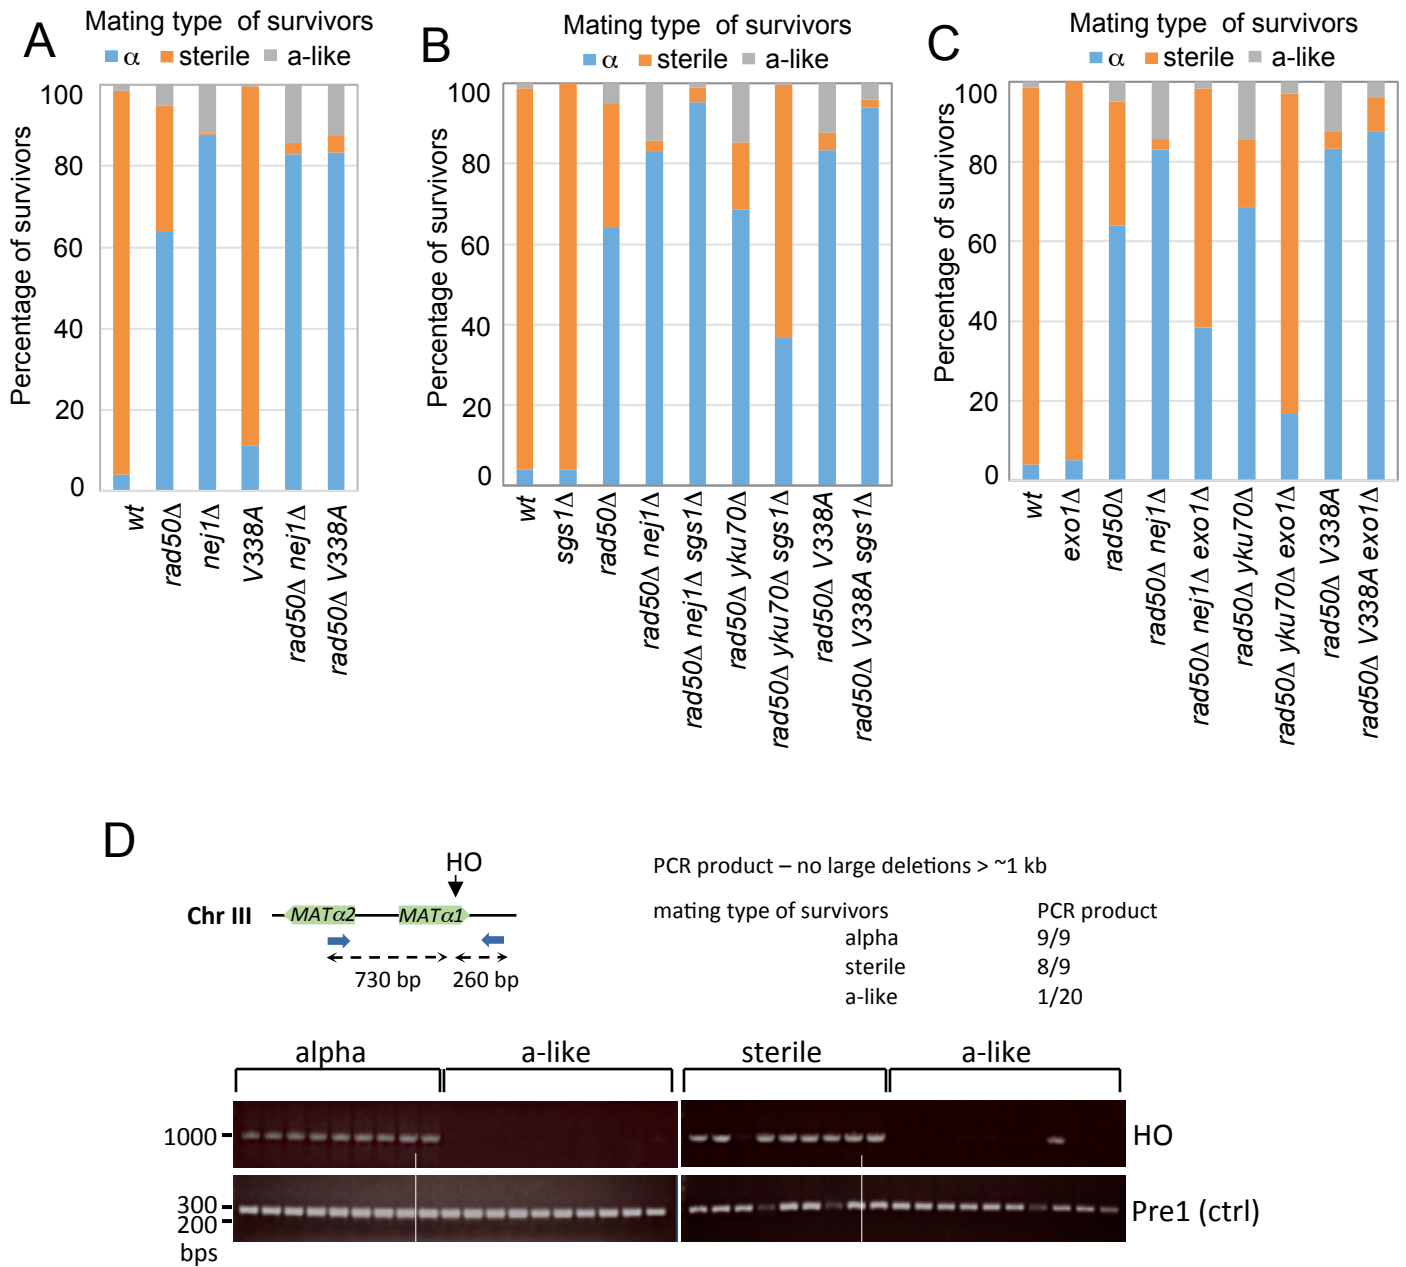

**Figure S3. Mating types of all survivors in Fig 5D-F.** (A-C) Mating type analysis of survivors of chronic DSB induction assays as in Fig 5D-F. Mating type of survivors was determined and interpreted as follows:  $\alpha$  survivors, (mutated HO endonuclease), sterile survivors (small insertions and deletions) and “a-like” survivors ( $>700$ bps deletion) in (A) wild type (JC727), *lif1* $\Delta$  (JC1343), *nej1* $\Delta$  (JC1342), *nej1*-V338A (JC2659), *yku70* $\Delta$  (JC3848), *rad50* $\Delta$  (JC3313), *nej1* $\Delta$  *rad50* $\Delta$  (JC3314) and *nej1*-V338A *rad50* $\Delta$  (JC3833). (B) *sgs1* $\Delta$  (JC3757), *rad50* $\Delta$  *nej1* $\Delta$  *sgs1* $\Delta$  (JC3761), *rad50* $\Delta$  *yku70* $\Delta$  (JC3835), *rad50* $\Delta$  *yku70* $\Delta$  *sgs1* $\Delta$  (JC3840) and *rad50* $\Delta$  *nej1*-V338A *sgs1* $\Delta$  (JC3846). (C) *exo1* $\Delta$  (JC3767), *rad50* $\Delta$  (JC3313), *rad50* $\Delta$  *nej1* $\Delta$  *exo1* $\Delta$  (JC3770), *rad50* $\Delta$  *yku70* $\Delta$  *exo1* $\Delta$  (JC3841), and *rad50* $\Delta$  *nej1*-V338A *exo1* $\Delta$  (JC3774). (D) PCR with deletion validation (DV) primers to detect the presence or loss of gDNA surrounding the HO cut site following the repair of a chronic DSB in *nej1*-V338A (JC2659) alpha, sterile and a-like survivors, with Pre1 serving as a control. Loss of PCR product signifies the deletion of a large region of gDNA on either side of the HO DSB during repair.

**Table S1: % G1 arrested cells following alpha-factor treatment vs asynchronous cells**

| <b>Strain</b>                    | <b>G1 arrested Cells (%G1)</b> | <b>asynchronous cells (%G1)</b> |
|----------------------------------|--------------------------------|---------------------------------|
| wt                               | 89.42                          | 39.34                           |
| <i>nej1</i> Δ                    | 95.01                          | 44.40                           |
| <i>nej1-V338A</i>                | 99.16                          | 32.50                           |
| <i>yku70</i> Δ                   | 93.13                          | 35.14                           |
| <i>lif1</i> Δ                    | 90.60                          | 33.83                           |
| <i>exo1</i> Δ                    | 98.46                          | 28.86                           |
| <i>sgs1</i> Δ                    | 100.0                          | 37.52                           |
| <i>rad50</i> Δ                   | 100.0                          | 34.35                           |
| <i>nej1</i> Δ <i>exo1</i> Δ      | 93.96                          | 26.08                           |
| <i>nej1</i> Δ <i>sgs1</i> Δ      | 97.61                          | 34.19                           |
| <i>nej1</i> Δ <i>rad50</i> Δ     | 82.78                          | 32.84                           |
| <i>nej1-V338A</i> <i>exo1</i> Δ  | 89.28                          | 32.51                           |
| <i>nej1-V338A</i> <i>sgs1</i> Δ  | 87.47                          | 39.47                           |
| <i>nej1-V338A</i> <i>rad50</i> Δ | 95.19                          | 35.02                           |
| <i>yku70</i> Δ <i>exo1</i> Δ     | 85.09                          | 24.02                           |
| <i>yku70</i> Δ <i>sgs1</i> Δ     | 95.96                          | 32.97                           |
| <i>yku70</i> Δ <i>rad50</i> Δ    | 97.94                          | 30.10                           |

**Table S2: Strains used in this study**

| <b>Strain</b> | <b>Genotype</b>                                                                                     | <b>Reference</b> |
|---------------|-----------------------------------------------------------------------------------------------------|------------------|
| JC727         | MAT $\alpha$ ; <i>hml::ADE1 hmr::ADE1 ade3::GAL-HO ade1-100 leu2-3, 112 lys5 trp1::hisG ura3-52</i> | JKM179, [36]     |
| JC1342        | JC727 with <i>nej1<math>\Delta</math>::KanMX6</i>                                                   | MAV015, [13]     |
| JC1343        | JC727 with <i>lif1<math>\Delta</math>::KanMX6</i>                                                   | [13]             |
| JC1687        | JC727 with <i>NEJ1-13Myc::TRP1</i>                                                                  | [16]             |
| JC2659        | JC727 with <i>nej1<math>\Delta</math>::KanMX6; nej1-V338A::URA3</i>                                 | [16]             |
| JC2665        | JC727 with <i>LIF1-3HA::TRP1</i>                                                                    | This study       |
| JC2884        | JC2665 with <i>nej1<math>\Delta</math>::KanMX6</i>                                                  | This study       |
| JC3160        | JC1342 with <i>nej1-V338A-13Myc::TRP1</i>                                                           | This study       |
| JC3306        | JC727 with <i>RAD50-3HA::TRP1</i>                                                                   | This study       |
| JC3307        | JC3306 with <i>nej1<math>\Delta</math>::KanMX6</i>                                                  | This study       |
| JC3313        | JC727 with <i>rad50<math>\Delta</math>::URA3</i>                                                    | This study       |
| JC3314        | JC727 with <i>rad50<math>\Delta</math>::URA3 nej1<math>\Delta</math>::KanMX6</i>                    | This study       |
| JC3315        | JC727 with <i>rad50<math>\Delta</math>::URA3 nej1<math>\Delta</math>::KanMX6</i>                    | This study       |
| JC3347        | JC 3306 with <i>nej1<math>\Delta</math>::KanMX6; nej1-V338A::URA3</i>                               | This study       |
| JC3585        | MAT $\alpha$ ; <i>hml::ADE1 hmr::ADE1 ade3::GAL-HO ade1 leu2-3, 112 lys5 trp1::hisG ura3-52</i>     | This study       |
| JC3632        | JC3585 with <i>yku70<math>\Delta</math>::KanMX6</i>                                                 | This study       |
| JC3754        | JC3585 with <i>sgs1<math>\Delta</math>::NatRMX4</i>                                                 | This study       |
| JC3755        | JC3585 with <i>exo1<math>\Delta</math>::NatRMX4</i>                                                 | This study       |
| JC3757        | JC727 with <i>sgs1<math>\Delta</math>::NatRMX4</i>                                                  | This study       |
| JC3761        | JC3314 with <i>sgs1<math>\Delta</math>::NatRMX4</i>                                                 | This study       |
| JC3767        | JC727 with <i>exo1<math>\Delta</math>::NatRMX4</i>                                                  | This study       |
| JC3770        | JC3314 with <i>exo1<math>\Delta</math>::NatRMX4</i>                                                 | This study       |
| JC3828        | JC2665 with <i>nej1<math>\Delta</math>::KanMX6; nej1-V338A::URA3</i>                                | This study       |
| JC3833        | JC2659 with <i>rad50<math>\Delta</math>::URA3</i>                                                   | This study       |
| JC3835        | JC3848 with <i>rad50<math>\Delta</math>::URA3</i>                                                   | This study       |
| JC3840        | JC3835 with <i>sgs1<math>\Delta</math>::NatRMX4</i>                                                 | This study       |
| JC3841        | JC3835 with <i>exo1<math>\Delta</math>::NatRMX4</i>                                                 | This study       |
| JC3846        | JC3833 with <i>sgs1<math>\Delta</math>::NatRMX4</i>                                                 | This study       |
| JC3847        | JC3833 with <i>exo1<math>\Delta</math>::NatRMX4</i>                                                 | This study       |
| JC3848        | JC727 with <i>yku70<math>\Delta</math>:: KanMX6</i>                                                 | This study       |
| JC3850        | JC3632 with <i>sgs1<math>\Delta</math>::NatRMX4</i>                                                 | This study       |
| JC3877        | JC3632 with <i>exo1<math>\Delta</math>::NatRMX4</i>                                                 | This study       |
| JC3878        | JC3632 with <i>rad50<math>\Delta</math>::URA3</i>                                                   | This study       |
| JC3880        | JC3878 with <i>exo1<math>\Delta</math>::NatRMX4</i>                                                 | This study       |
| JC3881        | JC3882 with <i>exo1<math>\Delta</math>::NatRMX4</i>                                                 | This study       |
| JC3882        | JC3585 with <i>rad50<math>\Delta</math>::URA3</i>                                                   | This study       |
| JC3883        | JC3882 with <i>sgs1<math>\Delta</math>::NatRMX4</i>                                                 | This study       |
| JC3884        | JC3585 with <i>nej1<math>\Delta</math>::KanMX6</i>                                                  | This study       |
| JC3885        | JC3884 with <i>sgs1<math>\Delta</math>::NatRMX4</i>                                                 | This study       |
| JC3886        | JC3884 with <i>exo1<math>\Delta</math>::NatRMX4</i>                                                 | This study       |
| JC3887        | JC3884 with <i>rad50<math>\Delta</math>::URA3</i>                                                   | This study       |
| JC3888        | JC3887 with <i>sgs1<math>\Delta</math>::NatRMX4</i>                                                 | This study       |
| JC3889        | JC3887 with <i>exo1<math>\Delta</math>::NatRMX4</i>                                                 | This study       |
| JC3896        | JC3585 with <i>nej1<math>\Delta</math>::KanMX6; nej1-V338A::URA3</i>                                | This study       |
| JC3897        | JC3896 with <i>rad50<math>\Delta</math>::URA3</i>                                                   | This study       |
| JC3898        | JC3896 with <i>sgs1<math>\Delta</math>::NatRMX4</i>                                                 | This study       |
| JC3899        | JC3896 with <i>exo1<math>\Delta</math>::NatRMX4</i>                                                 | This study       |
| JC3900        | JC3897 with <i>sgs1<math>\Delta</math>::NatRMX4</i>                                                 | This study       |
| JC3901        | JC3897 with <i>exo1<math>\Delta</math>::NatRMX4</i>                                                 | This study       |
| JC3906        | JC3585 with <i>lif1<math>\Delta</math>::KanMX6</i>                                                  | This study       |
| JC3907        | JC3906 with <i>rad50<math>\Delta</math>::URA3</i>                                                   | This study       |
| JC3928        | JC3632 with <i>nej1<math>\Delta</math>::KanMX6</i>                                                  | This study       |
| JC4010        | JC3585 with <i>mre11-3::URA3</i>                                                                    | [18]             |
| JC4047        | JC4010 with <i>sgs1<math>\Delta</math>::NatRMX4</i>                                                 | This study       |

|        |                                                |            |
|--------|------------------------------------------------|------------|
| JC4048 | JC4010 with <i>exoI</i> Δ:: <i>NatRMX4</i>     | This study |
| JC4049 | JC4010 with <i>nejI</i> Δ:: <i>KANMX6</i>      | This study |
| JC4051 | JC4049 with <i>sgsI</i> :: <i>NATMX4</i>       | This study |
| JC4052 | JC4049 with <i>exoI</i> :: <i>NATMX4</i>       | This study |
| JC4179 | JC4010 with <i>nejI</i> -V338A:: <i>KANMX6</i> | This study |
| JC4180 | JC4079 with <i>sgsI</i> :: <i>NATMX4</i>       | This study |
| JC4181 | JC 4079 with <i>exoI</i> :: <i>NATMX4</i>      | This study |

**Table S3: Primers and probes used in this study**

| <b>Primer Name</b>  | <b>Primer Sequence (5'-3')</b>            |
|---------------------|-------------------------------------------|
| HO2 Forward Primer  | TTGCCCACTTCTAAGCTGATTC                    |
| HO2 Reverse Primer  | GTACTTTTCTACATTGGGAAGCAATAAA              |
| HO2 Probe           | FAM-ATGATGTCTGGGTTTTGTTTGGGATGCA-TAMRA    |
| HO6 Forward Primer  | AATATGGGACTACTTCGCGCAACA                  |
| HO6 Reverse Primer  | CGTCACCACGTA CTTCAGCATAA                  |
| HO6 Probe           | FAM-CCTGGTTTTGGTTTTGTAGAGTGGTTGACGA-TAMRA |
| SMC2 Forward Primer | AATTGGATTTGGCTAAGCGTAATC                  |
| SMC2 Reverse Primer | CTCCAATGTCCCTCAAATTTCTT                   |
| SMC2 Probe          | FAM-CGACGCGAATCCATCTTCCCAAATAATT-TAMRA    |
| MAT1 Forward Primer | CCTGGTTTTGGTTTTGTAGAGTGG                  |
| MAT1 Reverse Primer | GAGCAAGACGATGGGGAGTTTC                    |
| MAT2 Forward Primer | ATTGCGACAAGGCTTCACCC                      |
| MAT2 Reverse Primer | CACATCACAGGTTTATTGGTTCC                   |
| Pre1 Forward Primer | CCCACAAGTCCTCTGATTTACATTCCG               |
| Pre1 Reverse Primer | ATTCGATTGACAGGTGCTCCCTTTTC                |
| DV Forward Primer   | CTCATCTGTGATTTGTGGAT                      |
| DV Reverse Primer   | GAGGCAAGTAGATAAGGGTA                      |
